# Supplementary material for: Nanoconfinement of Mg6Pd particles in porous carbon: size effects on structural and hydrogenation properties
Source: Royal Society of Chemistry journal article supplement (doi:10.1039/c4ta02669a), 2014-01-01
Supplement: c4ta02669a1.pdf [file c4ta02669a1.pdf]

## Supplementary information

### Nanoconfinement of Mg<sub>6</sub>Pd particles in porous carbon: size effects on structural and hydrogenation properties

M. Ponthieu<sup>1,2</sup>, Y.S. Au<sup>3</sup>, K. Provost<sup>1</sup>, C. Zlotea<sup>1</sup>, E. Leroy<sup>1</sup>, J.F. Fernández<sup>2</sup>, M. Latroche<sup>1</sup>, P.E. de Jongh<sup>3</sup>, F. Cuevas<sup>1\*</sup>

<sup>1</sup>ICMPE/CNRS-UPEC UMR 7182, 2-8 rue Henri Dunant, 94320 Thiais, France

<sup>2</sup>Dpto. Física de Materiales, Facultad de Ciencias, Universidad Autónoma de Madrid, 28049, Madrid, Spain

<sup>3</sup>Inorganic Chemistry and Catalysis, Debye Institute for Nanomaterials Science, Utrecht University, Universiteitweg 99, 3584 CG Utrecht, The Netherlands

As described by Samson [1] and illustrated in Figure S1, the Mg<sub>6</sub>Pd structure comprises 3 sites (10, 11, 13) exclusively occupied by Pd atoms and one shared with Mg (12). The distribution of Pd-Mg interatomic distances and number of Mg atoms around each Pd-site are gathered in Table S1. All together, these 4 independent sites provide 14 different Pd-Mg interatomic distances in the 2.5-3.5 Å range. Taking into account the multiplicity and occupancy of each site, the average coordination number in the first Pd sphere contains 10.8 Mg atoms (approximated to 11 for EXAFS fits). To ensure convergence of EXAFS fits, the 14 different Pd-Mg interatomic distances have been reduced to three (3R-model) and four (4R-model) averaged distances.

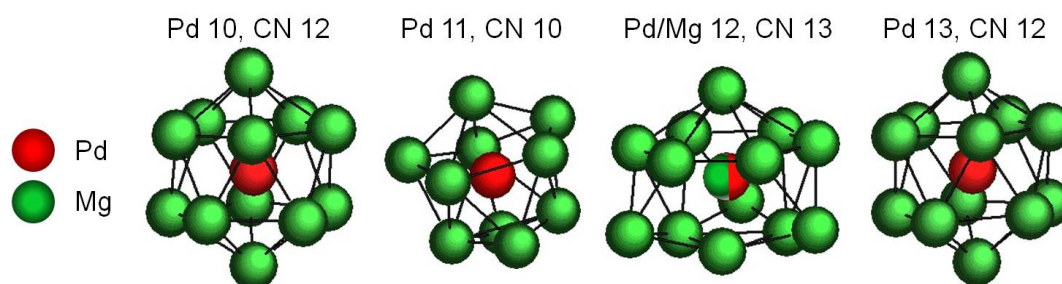

Figure S1. Representation of the first coordination sphere around each Pd site in the Mg<sub>6</sub>Pd structure.

\* Corresponding author: Tel: +33 (0)1 49 78 12 25, Fax: +33 (0)1 49 78 12 03, E-mail: cuevas@icmpe.cnrs.fr

Table S1. Distribution of the Pd-Mg distances in Mg<sub>6</sub>Pd bulk (a = 20.108 Å, site occupancy factors for Pd and Mg atoms on site 12 both taken as 0.5).

| Pd10       | Pd11                                                                                  | Pd12       | Pd13       | Average       | 4R-model        | 3R-model        |                 |
|------------|---------------------------------------------------------------------------------------|------------|------------|---------------|-----------------|-----------------|-----------------|
|            | 3Mg 2.669Å                                                                            |            |            | 0.86Mg 2.669Å | 1.71Mg<br>2.69Å | 5.71Mg<br>2.79Å |                 |
|            | 3Mg 2.708Å                                                                            |            |            | 0.86Mg 2.708Å |                 |                 |                 |
| 3Mg 2.783Å |                                                                                       |            |            | 0.86Mg 2.783Å | 4.00Mg<br>2.84Å |                 |                 |
|            |                                                                                       | 1Mg 2.835Å |            | 0.14Mg 2.835Å |                 |                 |                 |
| 3Mg 2.837Å |                                                                                       |            | 3Mg 2.840Å | 0.86Mg 2.837Å | 0.86Mg 2.840Å   |                 |                 |
|            |                                                                                       |            | 3Mg 2.865Å | 0.86Mg 2.865Å |                 |                 |                 |
|            |                                                                                       | 3Mg 2.874Å |            | 0.43Mg 2.874Å |                 |                 |                 |
|            |                                                                                       |            | 3Mg 2.940Å | 0.86Mg 2.940Å | 3.43Mg<br>2.96Å |                 | 3.43Mg<br>2.96Å |
|            | 3Mg 2.944Å                                                                            |            |            | 0.86Mg 2.994Å |                 |                 |                 |
|            |                                                                                       |            | 3Mg 2.965Å | 0.86Mg 2.965Å |                 |                 |                 |
| 3Mg 2.997Å |                                                                                       |            |            | 0.86Mg 2.997Å |                 |                 |                 |
|            |                                                                                       | 6Mg 3.115Å |            | 0.86Mg 3.115Å | 1.71Mg<br>3.12Å | 1.71Mg<br>3.12Å |                 |
| 3Mg 3.125Å |                                                                                       |            |            | 0.86Mg 3.125Å |                 |                 |                 |
|            | <i>Following atoms are not included in the 1<sup>st</sup> coordination EXAFS fit:</i> |            |            |               |                 |                 |                 |
|            |                                                                                       |            |            | 0.29Mg 3.626Å | 0.71Mg<br>3.71Å | 0.71Mg<br>3.71Å |                 |
|            |                                                                                       |            |            | 0.43Mg 3.732Å |                 |                 |                 |

Figure S2 shows theoretical EXAFS spectra and FT moduli of bulk  $\text{Mg}_6\text{Pd}$  for each of the four different Pd sites as well as their average contribution. Variations in amplitude and phase between contributions lead to a damped FT average signal, especially for the first coordination sphere.

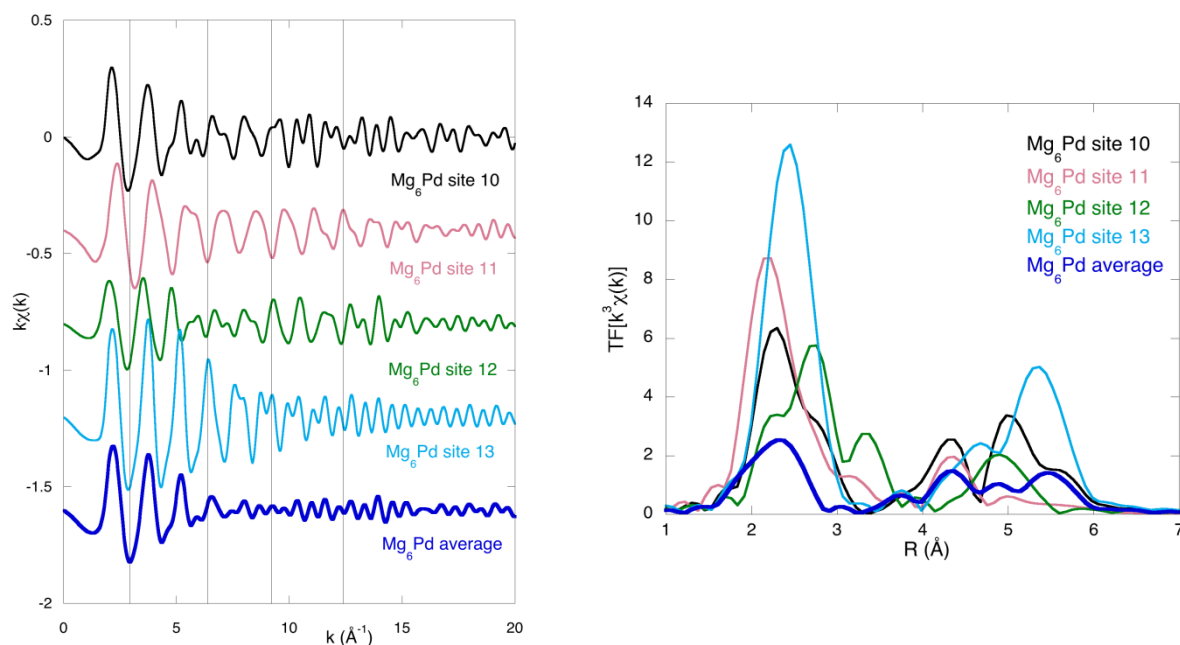

Figure S2. Comparison of EXAFS theoretical signals (left) and FT moduli (right) for the four Pd sites in  $\text{Mg}_6\text{Pd}$  and their averaged contribution to the overall spectrum. The vertical lines emphasize the phase shifts between the signals of the different sites.

## References

- [1] Samson S. Complex Cubic  $\text{A}_6\text{B}$  Compounds. II. The crystal structure of  $\text{Mg}_6\text{Pd}$ . Acta Crystallogr 1972;B28:936.
